# Supplementary material for: Analysis of the human breast milk microbiome and bacterial extracellular vesicles in healthy mothers
Source: PubMed Central journal article supplement (PMC8080581; doi:10.1038/s12276-020-0470-5), 2020-08-03
Supplement: 12276_2020_470_MOESM1_ESM.pdf [file 12276_2020_470_MOESM1_ESM.pdf]

**TABLE S1** Correlation between the taxa present in bacteria and bacterial extracellular vesicle samples.

| Taxon                   | Bacteria |        | Extracellular vesicles |        | Pearson correlation |         |
|-------------------------|----------|--------|------------------------|--------|---------------------|---------|
|                         | mean     | SD     | mean                   | SD     | Correlation         | p-value |
| <i>Streptococcus</i>    | 0.2509   | 0.2092 | 0.0348                 | 0.0280 | 0.0231              | 0.919   |
| <i>Bacteroides</i>      | 0.0392   | 0.0394 | 0.0911                 | 0.0542 | -0.1276             | 0.575   |
| <i>Staphylococcus</i>   | 0.1071   | 0.1227 | 0.0220                 | 0.0267 | 0.1308              | 0.562   |
| <i>Acinetobacter</i>    | 0.0202   | 0.0232 | 0.0691                 | 0.0815 | 0.5414              | 0.009   |
| Enterobacteriaceae(f)   | 0.0299   | 0.0584 | 0.0450                 | 0.0360 | 0.2586              | 0.245   |
| Ruminococcaceae(f)      | 0.0203   | 0.0243 | 0.0489                 | 0.0447 | 0.4867              | 0.022   |
| <i>Bifidobacterium</i>  | 0.0224   | 0.0242 | 0.0418                 | 0.0464 | 0.6676              | <0.001  |
| <i>Prevotella</i>       | 0.0356   | 0.0579 | 0.0250                 | 0.0421 | -0.1578             | 0.483   |
| Lactobacillaceae(f)     | 0.0015   | 0.0030 | 0.0545                 | 0.0905 | 0.3049              | 0.168   |
| Clostridiales(o)        | 0.0194   | 0.0225 | 0.0346                 | 0.0259 | 0.2678              | 0.228   |
| <i>Corynebacterium</i>  | 0.0289   | 0.0786 | 0.0244                 | 0.0534 | -0.0558             | 0.805   |
| <i>Akkermansia</i>      | 0.0132   | 0.0203 | 0.0379                 | 0.0323 | 0.1152              | 0.609   |
| <i>Lactobacillus</i>    | 0.0275   | 0.0395 | 0.0191                 | 0.0270 | 0.3725              | 0.088   |
| <i>Pseudomonas</i>      | 0.0362   | 0.1521 | 0.0093                 | 0.0090 | -0.0262             | 0.908   |
| <i>Dialister</i>        | 0.0205   | 0.0398 | 0.0155                 | 0.0319 | -0.0499             | 0.825   |
| <i>Stenotrophomonas</i> | 0.0202   | 0.0469 | 0.0138                 | 0.0453 | -0.0481             | 0.831   |
| <i>Blautia</i>          | 0.0165   | 0.0385 | 0.0135                 | 0.0142 | -0.0324             | 0.886   |
| <i>Sphingomonas</i>     | 0.0144   | 0.0498 | 0.0134                 | 0.0228 | -0.0532             | 0.814   |
| <i>Haemophilus</i>      | 0.0191   | 0.0219 | 0.0077                 | 0.0134 | 0.3138              | 0.155   |
| <i>Neisseria</i>        | 0.0155   | 0.0388 | 0.0070                 | 0.0106 | -0.0473             | 0.834   |
| <i>Streptophyta(o)</i>  | 0.0038   | 0.0060 | 0.0157                 | 0.0336 | 0.0359              | 0.874   |
| Lachnospiraceae(f)      | 0.0103   | 0.0130 | 0.0087                 | 0.0090 | -0.1354             | 0.548   |
| Comamonadaceae(f)       | 0.0068   | 0.0175 | 0.0119                 | 0.0282 | 0.9507              | <0.001  |
| <i>Collinsella</i>      | 0.0057   | 0.0091 | 0.0116                 | 0.0200 | -0.1349             | 0.55    |
| <i>Rothia</i>           | 0.0120   | 0.0156 | 0.0047                 | 0.0094 | 0.6018              | 0.003   |
| <i>Faecalibacterium</i> | 0.0149   | 0.0191 | 0.0014                 | 0.0024 | 0.1400              | 0.534   |
| <i>Actinomyces</i>      | 0.0051   | 0.0086 | 0.0105                 | 0.0150 | 0.1149              | 0.611   |
| Clostridiaceae(f)       | 0.0038   | 0.0059 | 0.0108                 | 0.0133 | 0.4420              | 0.039   |
| <i>Burkholderia</i>     | 0.0021   | 0.0040 | 0.0114                 | 0.0383 | -0.1177             | 0.602   |
